# Supplementary material for: Alleviation of DSS-induced colitisvia Lactobacillus acidophilustreatment in mice
Source: Royal Society of Chemistry journal article supplement (doi:10.1039/d0fo01724h), 2020-12-16
Supplement: d0fo01724h1.pdf [file d0fo01724h1.pdf]

1

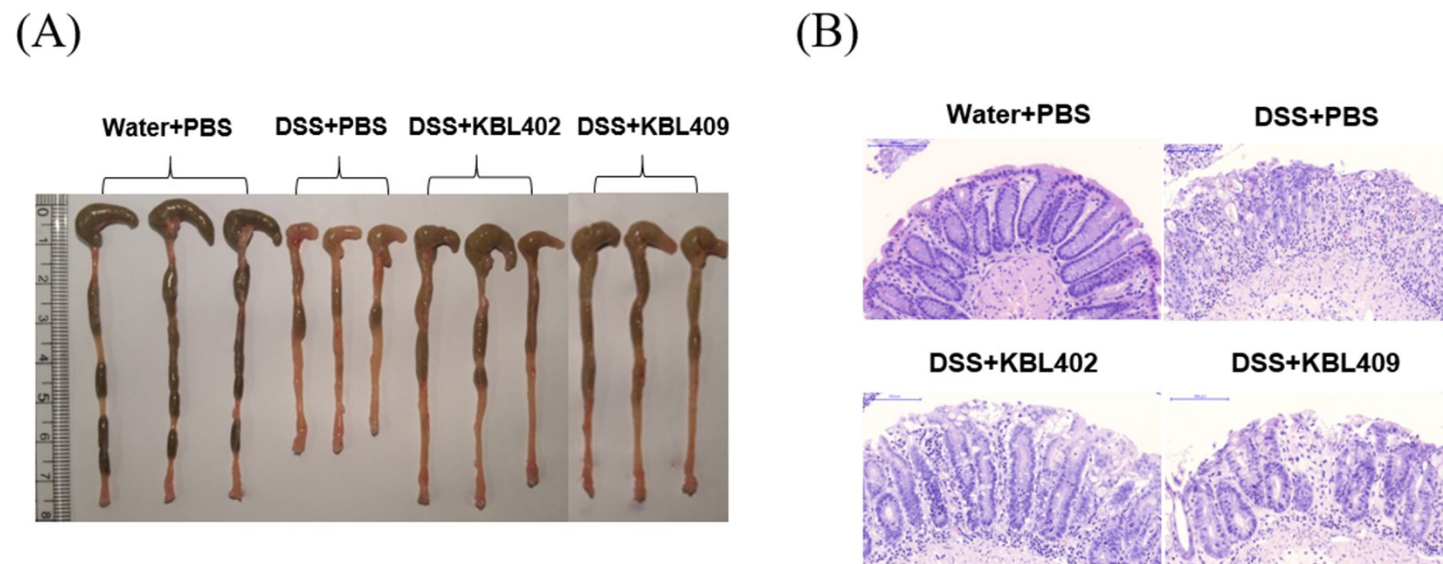

2

3

4 **Fig. S1** Improvements in colitis symptoms using *Lactobacillus acidophilus* (*L. acidophilus*) administration. (A) Colon lengths. (D) Colon  
5 histograms. Acute colitis was successfully developed in seven to eight week-old female C57BL/6J mice by administering water with 2% DSS  
6 for 7 days. Then, approximately  $1 \times 10^9$  colony-forming units of *L. acidophilus* KBL402 or KBL409 were orally administered daily. After 8  
7 days of *L. acidophilus* treatment, all mice were sacrificed and colon lengths of mice were measured. Distal segments were fixed in 10%  
8 formaldehyde and stained with hematoxylin and eosin.

9 **Table S1** Calculated disease activity index (DAI) score.

| <b>Score</b> | <b>Weight loss (%)</b> | <b>Stool consistency</b> | <b>Blood in feces</b>      |
|--------------|------------------------|--------------------------|----------------------------|
| 0            | None                   | Normal                   | Negative (no bleeding)     |
| 1            | 1.0-5.0                | -                        | -                          |
| 2            | 5.0-10.0               | Loose stools             | Positive (slight bleeding) |
| 3            | 10.0-15.0              | -                        | -                          |
| 4            | Over 15.0              | Watery diarrhea          | Gross bleeding             |

10

11

12

13

14

15

16

17

18

19

20

21

22 **Table S2** Histology scores of dextran sulfate sodium (DSS)-induced colitis.

| <b>Histological features</b>              | <b>Score</b> | <b>Description</b> |
|-------------------------------------------|--------------|--------------------|
| <b>Epithelium loss (%)</b>                | 0            | None               |
|                                           | 1            | 0.0-5.0%           |
|                                           | 2            | 5.0-10.0%          |
|                                           | 3            | Over 10.0%         |
| <b>Crypt damage</b>                       | 0            | None               |
|                                           | 1            | 0.0-10.0%          |
|                                           | 2            | 10.0-20.0%         |
|                                           | 3            | Over 20.0%         |
| <b>Depletion of goblet cells</b>          | 0            | None               |
|                                           | 1            | Mild               |
|                                           | 2            | Moderate           |
|                                           | 3            | Severe             |
| <b>Infiltration of inflammatory cells</b> | 0            | None               |
|                                           | 1            | Mild               |
|                                           | 2            | Moderate           |
|                                           | 3            | Severe             |
